# Supplementary material for: Comparing Observed and Reanalysis Data for Trends in Heat and Cold Waves in Brazil (1996–2022)
Source: Research Square preprint supplement (doi:10.21203/rs.3.rs-5412154/v1), 2024-11-26
Supplement: Supplementary file 1 [file e0878c8ddcf4643ef4f117a0.docx]

**Supporting information**

|  |  | **Heatwave** | | | **Coldwave** | | |
| --- | --- | --- | --- | --- | --- | --- | --- |
| **City** | **dataset** | **H1996-2005** | **H2006-2015** | **H2016-2022** | **C1996-2005** | **C2006-2015** | **C2016-2022** |
| Boa Vista | ISD | 3.44 | 0.33 | 2.33 | 0.56 | 1.67 | 1.22 |
| ERA5 | 2.33 | 1.11 | 3.67 | 2 | 1.33 | 0.44 |
| Macapa | ISD | 0 | 1.11 | 5.44 | 3.67 | 0.44 | 0.11 |
| ERA5 | 0.11 | 2.22 | 3.78 | 3.56 | 0.78 | 0.78 |
| Manaus | ISD | 3 | 1 | 2.11 | 0.22 | 1.33 | 0.44 |
| ERA5 | 1.22 | 2.22 | 4 | 1.22 | 0.78 | 0.56 |
| Belem | ISD | 0.78 | 3.78 | 0.22 | 1.11 | 0.33 | 1.89 |
| ERA5 | 0.22 | 4.56 | 1.78 | 3.11 | 0.67 | 0.89 |
| Santarem | ISD | 3.56 | 2.22 | 1.11 | 0.33 | 1.22 | 1.44 |
| ERA5 | 1.78 | 2.44 | 2.44 | 2.67 | 1.11 | 0.33 |
| Rio Branco | ISD | 3.11 | 1 | 2.11 | 0.89 | 1.78 | 0.89 |
| ERA5 | 0.22 | 2.22 | 4.11 | 3 | 1.67 | 0.33 |
| Tefe | ISD | 0.89 | 1.44 | 1.56 | 0.33 | 0.44 | 0.56 |
| ERA5 | 0.67 | 1.78 | 2.78 | 2.22 | 0.89 | 1 |
| Porto velho | ISD | 2.33 | 1.78 | 1 | 0.56 | 3.11 | 0.78 |
| ERA5 | 0.33 | 2 | 2.44 | 1.89 | 1.67 | 0.44 |
| Nova Maraba | ISD | 2.22 | 0.56 | 1.67 | 0.11 | 0.78 | 0.89 |
| ERA5 | 1.78 | 1.33 | 2.89 | 1.78 | 1 | 0 |
| Teresina | ISD | 0.67 | 2.89 | 2.44 | 2.22 | 0.56 | 1.22 |
| ERA5 | 0.22 | 3.11 | 2.44 | 3.44 | 0.56 | 0.67 |
| Natal | ISD | 2.33 | 1.33 | 0.44 | 0.89 | 3.22 | 1 |
| ERA5 | 0.89 | 1.56 | 3 | 1.33 | 2.67 | 1.22 |
| Sao Luis | ISD | 2.33 | 2.33 | 0.89 | 1.22 | 2 | 2.67 |
| ERA5 | 1.44 | 2.33 | 3.11 | 2.22 | 2.11 | 2.33 |
| Recife | ISD | 4.78 | 0.44 | 0 | 0.33 | 2.56 | 3 |
| ERA5 | 1.44 | 3 | 2 | 2.22 | 1.89 | 1.22 |
| Fortaleza | ISD | 1.22 | 4.22 | 1 | 2.56 | 2.22 | 2.89 |
| ERA5 | 0.44 | 2.56 | 3.89 | 2.78 | 2.67 | 3 |
| Maceio | ISD | 3.67 | 1.33 | 1.11 | 0.22 | 3 | 1.33 |
| ERA5 | 0.44 | 3.11 | 3 | 2.33 | 2.22 | 1.22 |
| Salvador | ISD | 1.67 | 1.67 | 1.44 | 1.67 | 1.67 | 0.78 |
| ERA5 | 2 | 2.56 | 2.11 | 2.44 | 1.22 | 1.56 |
| Cuiaba | ISD | 1.89 | 1.22 | 2.67 | 2.22 | 3.56 | 2.67 |
| ERA5 | 1 | 2.44 | 3.33 | 2.89 | 3.56 | 2.89 |
| Brasilia | ISD | 2.44 | 1.11 | 3.11 | 2.11 | 2.67 | 2.22 |
| ERA5 | 2.22 | 2.44 | 3.22 | 2.67 | 1.44 | 2.67 |
| Corumba | ISD | 0.44 | 0.33 | 5 | 2.11 | 3.11 | 2.11 |
| ERA5 | 1.22 | 1.78 | 3.11 | 2.11 | 3 | 2.56 |
| Ponta Pora | ISD | 2.22 | 0.56 | 3.67 | 1.78 | 3.89 | 1.44 |
| ERA5 | 1.78 | 1.56 | 3.56 | 3.11 | 2.33 | 2.33 |
| Campo Grande | ISD | 3.22 | 2.89 | 1 | 2.22 | 3.11 | 2.78 |
| ERA5 | 2.56 | 2.56 | 1.89 | 3.44 | 3.22 | 2.67 |
| Belo Horizonte | ISD | 0.78 | 2.11 | 3.33 | 1.11 | 3.33 | 2.11 |
| ERA5 | 1.56 | 2 | 2.56 | 1.44 | 3.33 | 2.67 |
| Campinas | ISD | 1.44 | 1.56 | 3 | 3.22 | 3.33 | 2 |
| ERA5 | 0.78 | 1.11 | 4.44 | 3.78 | 2.44 | 1.89 |
| Rio de Janeiro TJ | ISD | 1.22 | 1.78 | 2 | 3.22 | 1.78 | 2.44 |
| ERA5 | 1.89 | 1.56 | 2.44 | 3.22 | 2.11 | 2.22 |
| Rio de Janeiro SD | ISD | 1.67 | 1.33 | 2.89 | 3 | 2 | 1.44 |
| ERA5 | 2.11 | 1.22 | 3.11 | 3 | 1.89 | 2 |
| Sao Paulo | ISD | 0.89 | 1.22 | 3.89 | 3.11 | 3 | 2.22 |
| ERA5 | 1.22 | 1.78 | 4 | 3.11 | 3.33 | 2.56 |
| Londrina | ISD | 1.67 | 1.44 | 1.89 | 2.56 | 2.44 | 2.11 |
| ERA5 | 1.22 | 1.67 | 2.44 | 3.11 | 2.56 | 1.78 |
| Cataratas do Iguacu | ISD | 1.78 | 1.67 | 2.67 | 2.56 | 3 | 2 |
| ERA5 | 1.78 | 2.56 | 2.78 | 2.56 | 2.89 | 2.33 |
| Sao Jose dos Pinhais | ISD | 2.89 | 1.11 | 1.67 | 2.67 | 2.78 | 1.89 |
| ERA5 | 1.11 | 1.89 | 3 | 2.89 | 3 | 1.67 |
| Florianopolis | ISD | 1 | 1.89 | 2.44 | 3.22 | 2.89 | 1.89 |
| ERA5 | 1.78 | 1.67 | 2.78 | 3.11 | 2.22 | 1.89 |
| Porto Alegre | ISD | 1.33 | 2 | 2.67 | 2.44 | 3.22 | 1.78 |
| ERA5 | 1.33 | 2.33 | 2.78 | 2.78 | 3.22 | 2.11 |

Table S1: Yearly average number of heatwave and coldwave within each 9 year period for each location.

Table S2: Slopes based on the least squares regression method and the significance intervals associated with them. SHWERA5 = slope heatwave ERA5, F10yHWERA5= ten year trend heatwave ERA5; LCIWERA5 and UCIHWERA5= lower and upper confidence intervals for heatwave ERA5; SGHWERA5= significance at p-leval 0.05 for heatwave ERA 5. The same logic applies to the other indicators, with CWERA5= colwave ERA5, HWISD= heatwave ISD, and CWISD= coldwave ISD.
